# Supplementary material
Source: PubMed Central journal article supplement (PMC1637594)
Supplement: pnas_0607854103_5.pdf [file pnas_0607854103_5.pdf]

**Table 2. Pathology exhibited by Ctl44 knockout versus knockdown mice****Part I: Ctl44 knockout and control mice on NOD background****3-wk-old group**

| ID    | genotype | Age | Sex | lung | heart | exo. pancreas | skel muscle | liver | kid | stomach | colon | lachrymal gland | ovary | uterus | salivary gland | thyroid gland |    |
|-------|----------|-----|-----|------|-------|---------------|-------------|-------|-----|---------|-------|-----------------|-------|--------|----------------|---------------|----|
| #3-1  | Ctl44+/+ | 3wk | m   | 0    | 0     | 0             | 0           | 0     | 0   | 0       | 0     |                 | 0     | 0      | 0              | 0             |    |
| #3-2  | Ctl44+/+ | 3wk | f   | 0    | 0     | 0             | 0           | 0     | 0   | 0       | 0     |                 | 0     | 0      | 0              | nd            |    |
| #3-6  | Ctl44+/+ | 3wk | f   | 0    | 0     | 0             | 0           | 0     | 0   | 0       | 0     |                 | 0     | 0      | 0              | 0             |    |
| #3-7  | Ctl44+/+ | 3wk | m   | 0    | 0     | 0             | 0           | 0     | 0   | 0       | 0     |                 | 0     | 0      | 0              | 0             |    |
| #3-8  | Ctl44o/o | 3wk | m   | 0.5  | 3     | 3             | 0           | 1     | 0.5 | 1       | 0     |                 | 0     | na     | na             | 0             | nd |
| #3-9  | Ctl44o/o | 3wk | f   | 2    | 3     | 2             | 1           | 1     | 0.5 | 0       | 0     |                 | 0     | 1      | 3              | 0             | 0  |
| #3-11 | Ctl44o/o | 3wk | m   | 1    | 3     | 3             | 3           | 1     | 0.5 | 0       | 0     |                 | 0     | na     | na             | 1             | nd |
| #3-13 | Ctl44o/o | 3wk | m   | 2    | 3     | 3             | 1           | 1     | 0.5 | 2       | 0     |                 | 2     | na     | na             | 0             | nd |

**Part II: CT4KD7 knockdown and control mice on NOD background****3-wk-old group**

| ID   | genotype | Age   | Sex | lung | heart | exo. pancreas | skel muscle | liver | kid | stomach | colon | lachrymal gland | ovary | uterus | salivary gland | thyroid gland |    |
|------|----------|-------|-----|------|-------|---------------|-------------|-------|-----|---------|-------|-----------------|-------|--------|----------------|---------------|----|
| #120 | Tg-      | 3wk   | F   | 0    | 0     | 0             | 0           | 0     | 0   | 0       | 0     |                 | 0     | 0      | 0              | 0             | nd |
| #122 | Tg-      | 3wk   | F   | 0    | 0     | 0             | 0           | 0     | 0   | 0       | 0     |                 | 0     | 0      | 0              | 0             | nd |
| #133 | Tg-      | 3wk   | F   | nd   | nd    | 0             | nd          | nd    | nd  | nd      | nd    |                 | nd    | nd     | nd             | nd            | nd |
| #127 | Tg-      | 3wk   | F   | 0    | 0     | 0             | 0           | 0     | 0   | 0       | 0     |                 | 0     | 0      | 0              | 0             | 0  |
| #93  | Tg-      | 3.5wk | F   | 0    | 0     | nd            | 0           | 0     | 0   | 0       | 0     |                 | 0     | 0      | 0              | 0             | 0  |
| #94  | Tg-      | 3.5wk | F   | 0    | 0     | nd            | 0           | 0     | 0   | 0       | 0     |                 | 0     | 0      | 0              | 0             | 0  |
| #119 | KD7-20   | 3wk   | F   | 0    | 0     | 0.5           | 0           | 0     | 0   | 0       | 0     |                 | 0     | 0      | 0              | 0             | nd |
| #121 | KD7-20   | 3wk   | M   | 0    | 0     | nd            | 0           | 0     | 0   | 0       | 0     |                 | 0     | na     | na             | 0             | nd |
| #124 | KD7-20   | 3wk   | F   | nd   | nd    | 1             | nd          | nd    | nd  | nd      | nd    |                 | nd    | nd     | nd             | nd            | nd |
| #128 | KD7-20   | 3wk   | F   | 0    | 0     | 0             | 0           | 0     | 0   | 0       | 0     |                 | 0     | 0      | 0              | 1             | 0  |
| #130 | KD7-20   | 3wk   | M   | 0    | 0     | 0             | 0           | 0     | 0   | 0       | 0     |                 | 0     | na     | na             | 0             | 0  |
| #131 | KD7-20   | 3wk   | F   | 0    | 0     | 0             | 0           | 0     | 0   | 0       | 0     |                 | 0     | 0      | 0              | 0             | 0  |
| #91  | KD7-20   | 3.5wk | F   | 0    | 0     | nd            | 0           | 0     | 0   | 0       | 0.5   |                 | 0     | 0      | 0              | 1             | 0  |
| #92  | KD7-20   | 3.5wk | F   | 0    | 0     | nd            | 0           | 0     | 0   | 0       | 0     |                 | 0     | 0      | 0              | 1             | 0  |

## 5- to 7-wk-old group

| ID   | genotype | Age | Sex | lung | heart | exo. pancreas | skel muscle | liver | kid | stomach | colon | lachrymal gland | ovary | uterus | salivary gland | thyroid gland | Notes |          |
|------|----------|-----|-----|------|-------|---------------|-------------|-------|-----|---------|-------|-----------------|-------|--------|----------------|---------------|-------|----------|
| #67  | Tg-      | 7wk | F   | 0    | 0     | nd            | 0           | 0     | 0   | 0       | 0     |                 | 0     | 0      | 0              | 0             | 0     |          |
| #13  | Tg-      | 7wk | F   | 0    | 0     | 0             | 0           | 0     | 0   | 0       | 0     |                 | 0     | 0      | 0              | 1             | 0     |          |
| #69  | Tg-      | 7wk | F   | 0    | 0     | 0             | 0           | 0     | 0   | 0       | 0     |                 | 0     | 0      | 0              | 1             | 0     |          |
| #66  | Tg-      | 7wk | F   | nd   | nd    | 0             | nd          | nd    | nd  | nd      | nd    |                 | nd    | nd     | nd             | nd            | nd    |          |
| #75  | Tg-      | 7wk | F   | 0    | 0     | nd            | 0           | 0     | 0   | 0       | 0     |                 | 0     | 0      | 0              | 0             | 0     |          |
| #79  | Tg-      | 7wk | F   | 0    | 0     | 0             | 0           | 0     | 0   | 0       | 0     |                 | 0     | 0      | 0              | 0             | 0     |          |
| #61  | Tg-      | 7wk | M   | 0    | 0     | 0             | 0           | 0     | 0   | 0       | 0     |                 | 0     | na     | na             | 0             | 0     |          |
| #122 | PL4      | 5wk | M   | 0    | 0     | 0             | 0           | 0     | 0   | 0       | 0     |                 | 0     | na     | na             | 0             | 0     |          |
| #123 | PL4      | 5wk | M   | 0    | 0     | 0             | 0           | 0     | 0   | 0       | 0     |                 | 0     | na     | na             | 1             | 0     |          |
| #35  | PL4      | 7wk | F   | 0    | 0     | 0             | 0           | 0     | 0   | 0       | 0     |                 | 0     | 0      | 0              | 0.5           | 0     |          |
| #42  | PL4      | 7wk | F   | 0    | 0     | 0             | 0           | 0     | 0   | 0       | 0     |                 | 0     | 0      | 0              | 0             | nd    |          |
| #38  | PL4      | 7wk | M   | 0    | 0     | 0             | 0           | 0     | 0   | 0       | 0     |                 | 0     | na     | na             | 0             | 0     |          |
| #40  | PL4      | 7wk | M   | 0    | 0     | 0             | 0           | 0     | 0   | 0       | 0     |                 | 0     | na     | na             | 0             | 0     |          |
| #135 | KD7-26   | 5wk | M   | 0    | 0     | 0             | 0           | 0     | 0   | 0       | 0     |                 | 0     | na     | na             | 0             | 0     | diabetic |
| #132 | KD7-26   | 5wk | M   | 0    | 0     | 0             | 0           | 0     | 0   | 0.5     | 0.5   |                 | 0     | na     | na             | 0             | 0     | diabetic |
| #21  | KD7-20   | 6wk | M   | 2    | 0     | 0             | 0           | 0     | 1   | 0       | 0     |                 | 0     | na     | na             | 0.5           | nd    | diabetic |
| #17  | KD7-20   | 7wk | F   | 0    | 0     | 0             | 0.5         | 0.5   | 1   | 0       | 0     |                 | 0     | 0      | 0              | 1             | 0     | diabetic |
| #14  | KD7-20   | 7wk | F   | 2    | 0     | 0             | 0           | 0     | 0   | 0       | 0     |                 | 3     | 0      | 0              | 2             | 0     |          |
| #80  | KD7-20   | 7wk | F   | 1    | 0     | nd            | 1           | 1     | 2   | 1       | 0.5   |                 | 1     | 1      | 2              | 2             | nd    | diabetic |
| #76  | KD7-20   | 7wk | F   | 0.5  | 0     | 0.5           | 0           | 0     | 1   | 1       | 0     |                 | 0     | 0      | 0              | 2             | 0     |          |
| #74  | KD7-20   | 7wk | F   | 0.5  | 0     | 0             | 0           | 0     | 0   | 1       | 0     |                 | 0     | 0      | 0              | 3             | 0     |          |
| #78  | KD7-20   | 7wk | F   | 2    | 1     | 0             | 0           | 0     | 1   | 0       | 0     |                 | 0     | 0      | 0              | 2             | nd    |          |
| #70  | KD7-26   | 7wk | F   | 0    | 0     | nd            | 0           | 1     | 1   | 0       | 0     |                 | 1     | 2      | 2              | 1             | 2     | diabetic |
| #30  | KD7-26   | 7wk | F   | 0    | 0     | nd            | 0           | 0.5   | 0.5 | 0       | 0.5   |                 | 0     | 2      | 1              | 2             | nd    |          |
| #68  | KD7-26   | 7wk | F   | 0.5  | 0     | 0             | 0           | 0     | 1   | 0       | 0     |                 | 0     | 0      | 0              | 3             | 0     |          |
| #62  | KD7-26   | 7wk | M   | 0    | 0     | 0             | 0           | 0     | 0.5 | 0       | 0     |                 | 0     | na     | na             | 0             | nd    |          |

## 12- to 14-wk-old group

| ID   | genotype | Age  | Sex | lung | heart | exo. pancreas | skel muscle | liver | kid | stomach | colon | lachrymal gland | ovary | uterus | salivary gland | thyroid gland |    |
|------|----------|------|-----|------|-------|---------------|-------------|-------|-----|---------|-------|-----------------|-------|--------|----------------|---------------|----|
| #24  | Tg-      | 12wk | F   | 0    | 0     | 0             | 0           | 0     | 0.5 | 0       | 0     | 0               | 0     | 0      | 0              | 2             | 0  |
| #3   | Tg-      | 12wk | F   | 0    | 0     | 0             | 0           | 0     | 0   | 0       | 0     | 0               | 0     | 0      | 0              | 2             | 0  |
| #119 | Tg-      | 12wk | F   | 0    | 0     | 0             | 0           | 0     | 0   | 0       | 0     | 0               | 0     | 0      | 0              | nd            | nd |
| #113 | Tg-      | 12wk | F   | nd   | nd    | 0             | nd          | nd    | nd  | nd      | nd    | nd              | nd    | nd     | nd             | nd            | nd |
| #116 | Tg-      | 12wk | F   | nd   | nd    | 0             | nd          | nd    | nd  | nd      | nd    | nd              | nd    | nd     | nd             | nd            | nd |
| #155 | PL4      | 12wk | F   | nd   | nd    | 0             | nd          | nd    | nd  | nd      | nd    | nd              | nd    | nd     | nd             | nd            | nd |
| #157 | PL4      | 12wk | F   | nd   | nd    | 0             | nd          | nd    | nd  | nd      | nd    | nd              | nd    | nd     | nd             | nd            | nd |
| #23  | KD7-20   | 12wk | F   | 0.5  | 0     | 3             | 0           | 2     | 0.5 | 0.5     | 0     | 0               | 2     | 3      | 3              | 3             | 0  |
| #4   | KD7-20   | 12wk | F   | 1    | 0     | 1             | 0           | 0     | 0   | 0       | 0     | 1               | 0     | 0      | 3              | 1             |    |
| #6   | KD7-20   | 12wk | F   | 0    | 0     | 3             | 0           | 1     | 0   | 0       | 0     | 0               | 2     | 2      | 0              | 0             |    |
| #117 | KD7-20   | 14wk | F   | 3    | 0     | 0             | 0           | 0     | 3   | 1       | 0     | 0               | 3     | 2      | 3              | 3             |    |
| #110 | KD7-20   | 12wk | F   | nd   | nd    | 0             | nd          | nd    | nd  | nd      | nd    | nd              | nd    | nd     | nd             | nd            |    |
| #115 | KD7-20   | 12wk | F   | nd   | nd    | 0             | nd          | nd    | nd  | nd      | nd    | nd              | nd    | nd     | nd             | nd            |    |

## Part III: CT4KD7 and control mice on (B6xNOD) F<sub>1</sub> background

### 12-wk-old group

| ID   | genotype | Age  | Sex | lung | heart | exo. pancreas | skel muscle | liver | kid | stomach | colon | lachrymal gland | ovary | uterus | salivary gland | thyroid gland |
|------|----------|------|-----|------|-------|---------------|-------------|-------|-----|---------|-------|-----------------|-------|--------|----------------|---------------|
| #B1  | Tg-      | 12wk | F   | 0    | 0     | 0             | 0           | 0     | 0   | 0       | 0     | 0               | 0     | 0      | 0              | 0             |
| #B8  | Tg-      | 12wk | F   | 0    | 0     | 0             | 0           | 0     | 0   | 0       | 0     | 0               | 0     | 0      | 0              | nd            |
| #B10 | Tg-      | 12wk | M   | 0    | 0     | 0             | 0           | 0     | 0   | 0       | 0     | 0               | na    | na     | 0              | nd            |
| #B15 | Tg-      | 12wk | M   | 0    | 0     | 0             | 0           | 0     | 0   | 0       | 0     | 0               | na    | na     | 0              | 0             |
| #B2  | KD7-20   | 12wk | F   | 0    | 0     | 0             | 0           | 0     | 0   | 1       | 0     | 0               | 0     | 0      | 2              | 0             |
| #B7  | KD7-20   | 12wk | F   | 0.5  | 0     | 0             | 0           | 0.5   | 0   | 2       | 0     | 0               | 0     | 0      | 0.5            | 0             |
| #B11 | KD7-20   | 12wk | M   | 0    | 0     | 0             | 0           | 0     | 0   | 1       | 0     | 0               | na    | na     | 1              | nd            |
| #B13 | KD7-20   | 12wk | M   | 0    | 0     | 0             | 0           | 0     | 0   | 2       | 0     | 0               | na    | na     | 0.5            | 0             |

Score: trace, 0.5; mild, 1; moderate, 2; severe, 3. nd, not determined; na, not applicable.
