# Supplementary material
Source: PubMed Central journal article supplement (PMC1637594)

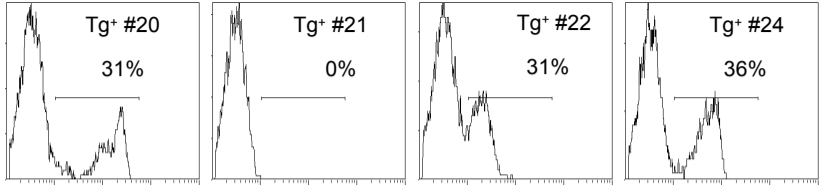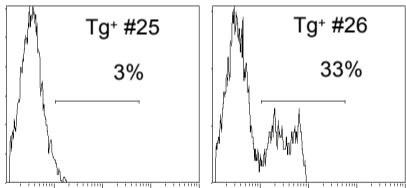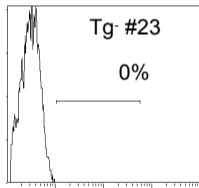

GFP

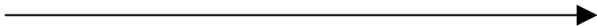

(Gated on CD4<sup>+</sup> PBMC)

Supplement: pnas_0607854103_1.pdf [file pnas_0607854103_1.pdf]

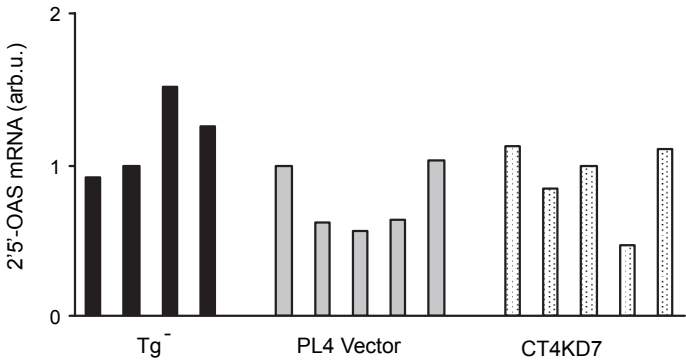

Supplement: pnas_0607854103_2.pdf [file pnas_0607854103_2.pdf]

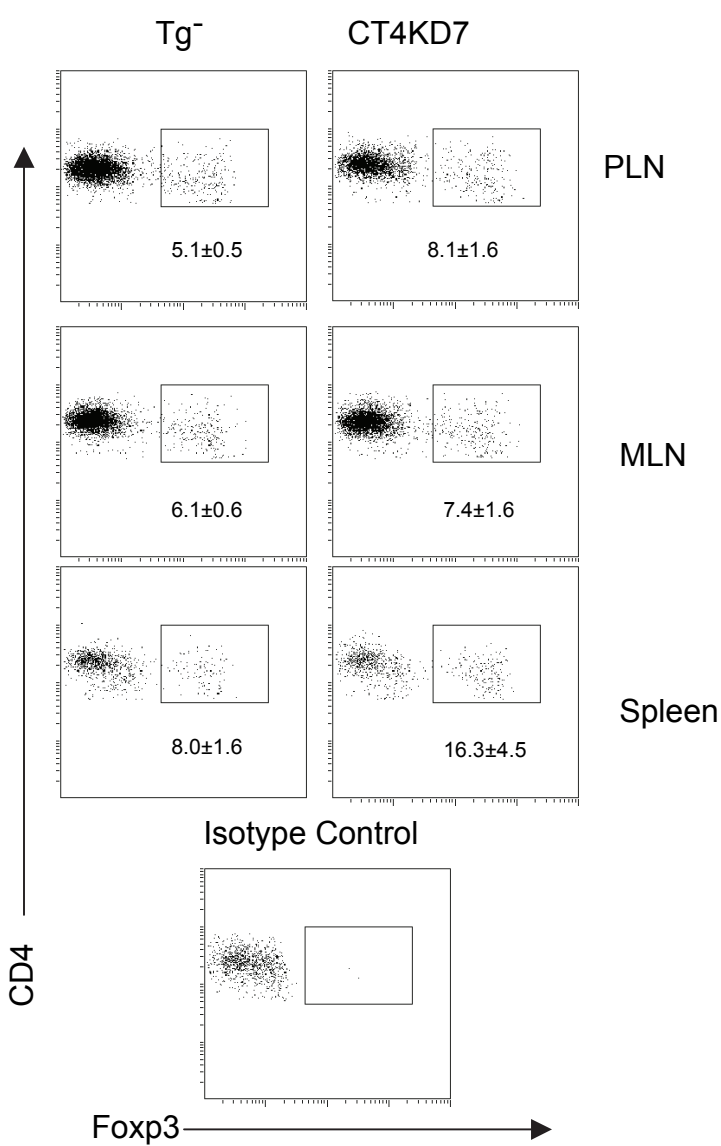

Supplement: pnas_0607854103_3.pdf [file pnas_0607854103_3.pdf]

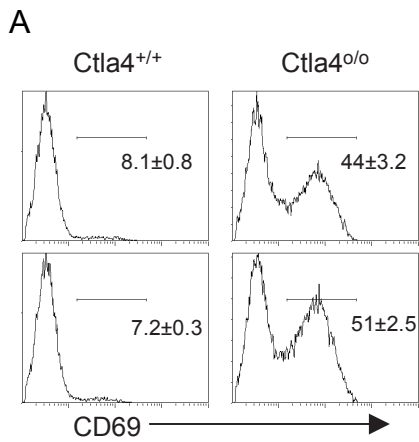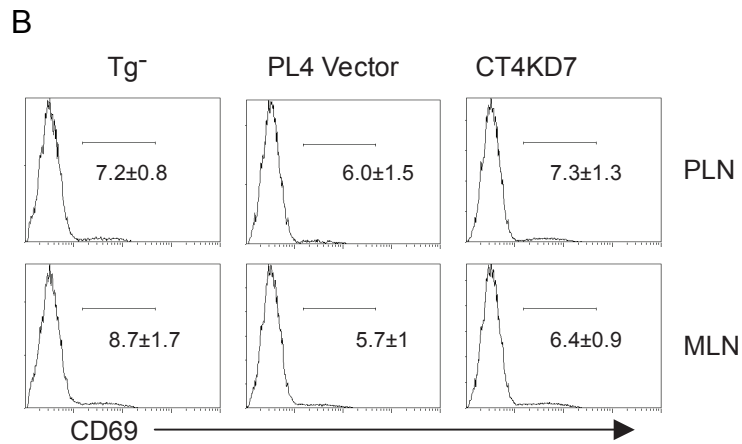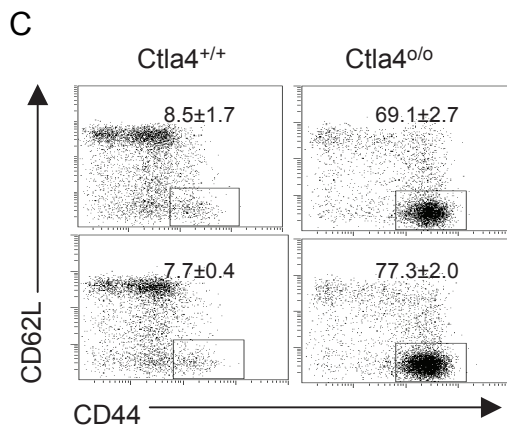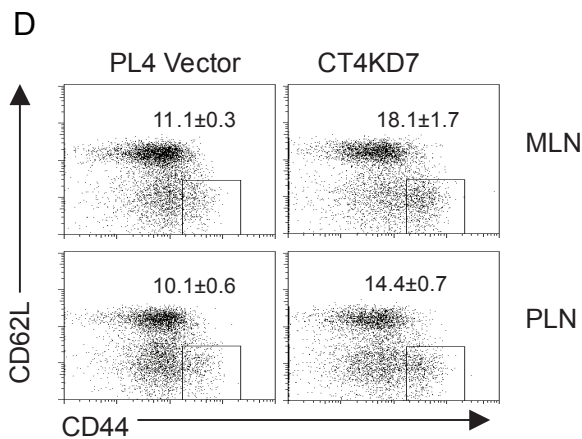

Supplement: pnas_0607854103_4.pdf [file pnas_0607854103_4.pdf]
